# Supplementary material
Source: ML conference proceedings conference paper supplement (https://openaccess.thecvf.com/content/CVPR2024/html/Wang_Real-IAD_A_Real-World_CVPR_2024_paper.html)
Supplement: Supplementary file 1 [file Wang_Real-IAD_A_Real-World_CVPR_2024_supplemental.pdf]

**Supplementary Materials for  
Real-IAD: A Real-World Multi-View Dataset for Benchmarking Versatile  
Industrial Anomaly Detection**

Chengjie Wang<sup>1,2</sup> Wenbing Zhu<sup>3,4</sup> Bin-Bin Gao<sup>2</sup> Zhenye Gan<sup>2</sup>  
Jiangning Zhang<sup>2</sup> Zhihao Gu<sup>1</sup> Shuguang Qian<sup>4</sup> Mingang Chen<sup>5</sup> Lizhuang Ma<sup>1</sup>

<sup>1</sup>Shanghai Jiao Tong University <sup>2</sup>Youtu Lab, Tencent <sup>3</sup>Fudan University <sup>4</sup>Rongcheer Co., Ltd

<sup>5</sup>Shanghai Development Center of Computer Software Technology

Website: <https://realiad4ad.github.io/Real-IAD>

In this supplementary material, we first give all 30 object visualizations including 12 complex products (mixed material and surfaces with complex geometries) and 18 simple products (single material, e.g., metal, plastic, wood, ceramics and etc., and simple and smooth surfaces) in Real-IAD in Fig 2. Then, some representative anomaly images covering all 8 defects, i.e., pit, deformation, abrasion, scratch, damage, missing, foreign objects, and contamination, are shown in Fig 1. In our main paper, we only report averaged results for all methods, here complete experimental results of all categories with both UIAD and FUIAD settings are reported in Tabs. 1, 2, 3, 4, 5 and 6.

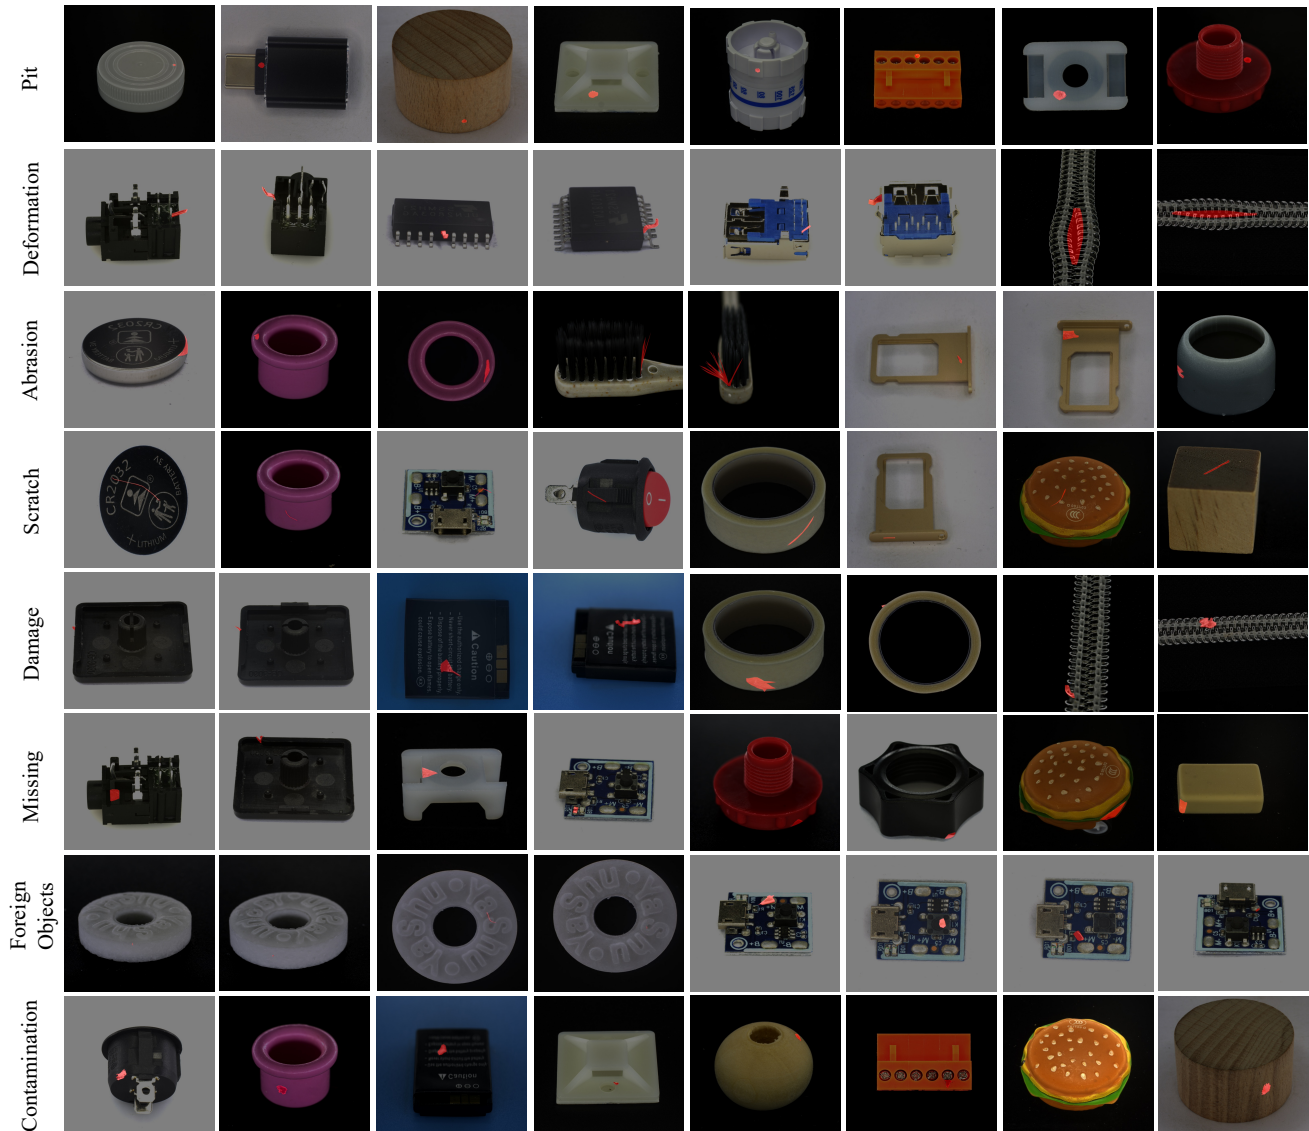

Figure 1. **Anomalies Visualization of Real-IAD.** Each row represents an anomaly class from different products and diverse locations. From top to bottom, they are pit, deformation, abrasion, scratch, damage, missing, foreign objects, and contamination, respectively.

## References

- [1] Thomas Defard, Aleksandr Setkov, Angélique Loesch, and Romaric Audigier. Padim: a patch distribution modeling framework for anomaly detection and localization. In *International Conference on Pattern Recognition*, pages 475–489. Springer, 2021. 4, 5, 6, 7, 8, 9
- [2] Hanqiu Deng and Xingyu Li. Anomaly detection via reverse distillation from one-class embedding. In *Proceedings of the IEEE/CVF Conference on Computer Vision and Pattern Recognition*, pages 9737–9746, 2022. 4, 5, 6, 7, 8, 9
- [3] Denis Gudovskiy, Shun Ishizaka, and Kazuki Kozuka. Cflow-

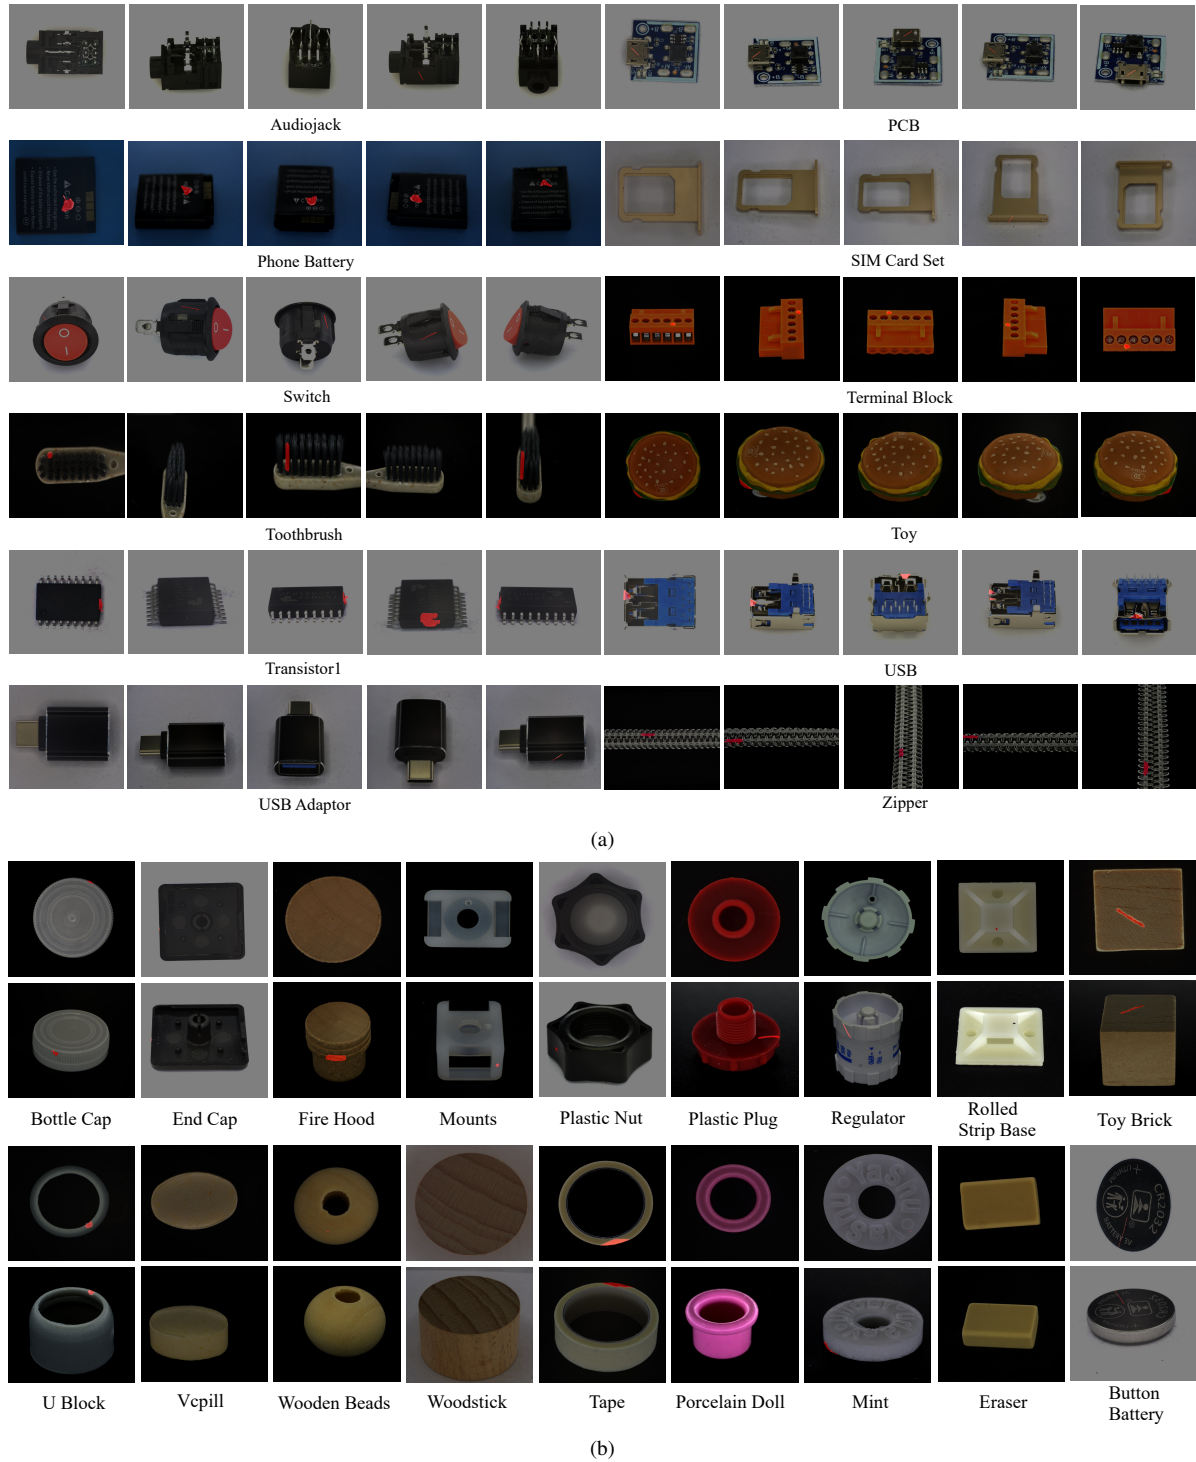

Figure 2. **Real-IAD Visualisation.** (a) The upper six rows show 12 complex objects and all 5 views of each object. (b) The bottom 4 rows show the remaining 18 simple objects and each object shows two views. All anomaly regions are marked in red. Best viewed in zoom and color.

ad: Real-time unsupervised anomaly detection with localiza-

tion via conditional normalizing flows. In *Proceedings of the*

Table 1. UIAD performance (I-AUROC / P-AUROC) comparisons with state-of-the-art anomaly detection methods on single-view Real-IAD.

| Category          | Embedding-based |             |              |              | Data-Aug-based |             | Reconstruction-based |             |
|-------------------|-----------------|-------------|--------------|--------------|----------------|-------------|----------------------|-------------|
|                   | PaDim[1]        | CFlow[3]    | PatchCore[6] | SoftPatch[4] | SimpleNet[5]   | DeSTSeg[8]  | RD[2]                | UniAD[7]    |
| Audiojack         | 81.6 / 89.6     | 77.0 / 85.4 | 84.0 / 88.7  | 83.8 / 92.2  | 88.1 / 90.7    | 88.0 / 94.2 | 83.5 / 91.2          | 82.2 / 85.7 |
| PCB               | 88.6 / 79.0     | 83.0 / 85.2 | 93.9 / 94.7  | 91.3 / 95.0  | 91.9 / 91.5    | 88.5 / 92.8 | 89.6 / 93.8          | 82.5 / 78.2 |
| Phone Battery     | 87.6 / 85.4     | 85.3 / 89.7 | 91.9 / 91.2  | 90.4 / 79.3  | 92.7 / 75.9    | 92.6 / 94.5 | 90.4 / 94.7          | 84.5 / 85.1 |
| SIM Card Set      | 94.8 / 95.2     | 97.1 / 94.7 | 98.5 / 97.2  | 96.2 / 88.7  | 98.6 / 86.4    | 95.0 / 94.3 | 91.9 / 97.3          | 94.6 / 91.5 |
| Switch            | 89.1 / 92.8     | 86.4 / 85.6 | 91.4 / 93.7  | 95.7 / 96.4  | 97.3 / 95.5    | 95.6 / 97.4 | 91.8 / 93.7          | 85.0 / 90.8 |
| Terminal Block    | 93.3 / 98.4     | 89.7 / 93.5 | 97.9 / 98.5  | 97.8 / 98.8  | 98.8 / 97.9    | 95.9 / 96.9 | 97.4 / 98.8          | 90.7 / 96.8 |
| Toothbrush        | 87.9 / 92.2     | 87.9 / 90.1 | 90.0 / 95.2  | 88.5 / 86.9  | 90.6 / 82.1    | 92.3 / 88.1 | 85.6 / 95.3          | 89.4 / 88.3 |
| Toy               | 94.1 / 83.0     | 90.5 / 77.9 | 89.2 / 90.1  | 91.4 / 92.4  | 91.1 / 87.3    | 85.2 / 83.8 | 86.6 / 93.9          | 74.5 / 79.8 |
| Transistor1       | 90.2 / 91.4     | 86.9 / 90.2 | 95.9 / 97.0  | 95.0 / 97.2  | 97.6 / 96.2    | 96.6 / 92.5 | 93.5 / 96.5          | 90.9 / 89.7 |
| USB               | 84.5 / 92.0     | 91.2 / 92.0 | 95.0 / 97.1  | 96.2 / 98.1  | 97.2 / 97.2    | 90.7 / 95.9 | 88.5 / 98.0          | 88.1 / 90.7 |
| USB Adaptor       | 86.7 / 87.2     | 75.8 / 87.3 | 82.7 / 89.8  | 86.6 / 88.9  | 86.5 / 85.7    | 84.0 / 83.9 | 78.8 / 91.3          | 76.4 / 71.3 |
| Zipper            | 94.4 / 90.2     | 95.6 / 93.4 | 98.8 / 96.1  | 98.1 / 95.4  | 99.6 / 94.5    | 99.9 / 95.8 | 99.6 / 98.1          | 95.4 / 94.0 |
| Bottle Cap        | 89.2 / 94.7     | 88.9 / 91.7 | 92.2 / 94.9  | 95.2 / 96.2  | 95.0 / 95.4    | 87.3 / 93.2 | 90.5 / 92.6          | 87.4 / 89.5 |
| End Cap           | 73.5 / 86.2     | 65.9 / 80.3 | 76.8 / 89.6  | 76.2 / 91.5  | 81.2 / 85.4    | 78.4 / 92.7 | 69.7 / 91.2          | 73.5 / 82.5 |
| Fire Hood         | 92.2 / 94.9     | 92.0 / 95.5 | 93.4 / 94.0  | 93.4 / 93.8  | 94.9 / 92.8    | 85.5 / 93.3 | 92.5 / 96.9          | 93.1 / 93.5 |
| Mounts            | 89.0 / 96.9     | 87.8 / 94.6 | 92.8 / 97.8  | 91.2 / 98.0  | 95.1 / 97.1    | 95.3 / 97.5 | 91.1 / 98.1          | 84.8 / 97.1 |
| Plastic Nut       | 76.1 / 81.3     | 77.9 / 81.8 | 84.7 / 82.9  | 81.8 / 95.5  | 85.8 / 88.4    | 85.1 / 90.0 | 82.6 / 93.2          | 71.3 / 82.8 |
| Plastic Plug      | 93.0 / 96.7     | 92.0 / 96.0 | 95.3 / 96.9  | 94.5 / 97.6  | 94.4 / 92.3    | 91.9 / 97.0 | 90.9 / 97.2          | 81.3 / 92.7 |
| Regulator         | 83.1 / 98.5     | 71.1 / 82.0 | 96.7 / 99.6  | 89.5 / 99.2  | 97.9 / 98.3    | 98.1 / 97.9 | 87.8 / 98.9          | 53.8 / 74.2 |
| Rolled Strip Base | 99.1 / 95.4     | 98.3 / 98.1 | 99.3 / 98.5  | 98.9 / 98.9  | 99.8 / 97.1    | 99.2 / 88.6 | 94.9 / 96.1          | 97.7 / 97.6 |
| Toy Brick         | 78.2 / 83.5     | 83.4 / 82.7 | 84.0 / 84.8  | 82.6 / 85.9  | 84.3 / 80.6    | 80.0 / 81.6 | 82.1 / 90.1          | 84.6 / 86.7 |
| U Block           | 89.3 / 97.2     | 85.0 / 95.9 | 93.4 / 98.7  | 91.6 / 97.9  | 93.4 / 95.1    | 90.0 / 96.7 | 88.5 / 98.1          | 80.4 / 88.4 |
| Vcpill            | 84.2 / 91.3     | 91.7 / 90.0 | 92.8 / 91.6  | 89.1 / 83.2  | 92.0 / 76.9    | 91.1 / 74.8 | 90.6 / 94.9          | 81.9 / 89.3 |
| Wooden Beads      | 86.3 / 86.1     | 84.0 / 84.4 | 84.4 / 84.4  | 85.4 / 85.3  | 85.2 / 78.7    | 86.4 / 83.6 | 78.8 / 85.6          | 81.3 / 76.7 |
| Woodstick         | 89.9 / 83.2     | 86.0 / 93.8 | 82.8 / 77.2  | 80.6 / 75.8  | 86.2 / 87.4    | 84.9 / 93.4 | 89.4 / 94.9          | 89.0 / 91.1 |
| Tape              | 96.4 / 98.2     | 95.8 / 97.7 | 98.7 / 99.0  | 98.9 / 99.2  | 98.7 / 97.9    | 98.9 / 98.4 | 98.2 / 98.8          | 97.7 / 97.6 |
| Porcelain Doll    | 79.3 / 88.9     | 84.3 / 93.4 | 88.6 / 96.0  | 85.8 / 94.7  | 87.0 / 88.2    | 83.3 / 75.7 | 87.5 / 95.4          | 66.9 / 84.7 |
| Mint              | 57.6 / 66.6     | 57.8 / 62.0 | 69.5 / 72.4  | 63.7 / 70.1  | 69.4 / 61.6    | 64.1 / 66.1 | 63.6 / 78.3          | 56.7 / 44.0 |
| Eraser            | 90.6 / 94.3     | 90.2 / 91.1 | 92.9 / 95.5  | 91.8 / 94.5  | 93.2 / 93.3    | 89.6 / 90.0 | 87.5 / 95.4          | 90.4 / 91.0 |
| Button Battery    | 78.3 / 88.2     | 72.5 / 80.9 | 85.5 / 91.2  | 86.6 / 86.7  | 87.7 / 81.1    | 81.1 / 90.0 | 83.6 / 94.1          | 74.1 / 78.2 |
| Average All       | 86.6 / 90.0     | 85.0 / 88.6 | 90.4 / 92.5  | 89.6 / 91.8  | 91.7 / 88.9    | 89.2 / 90.4 | 87.6 / 94.4          | 82.7 / 86.0 |

Top-view UAD

*IEEE/CVF Winter Conference on Applications of Computer Vision*, pages 98–107, 2022. 4, 5, 6, 7, 8, 9

[4] Xi Jiang, Jianlin Liu, Jinbao Wang, Qiang Nie, Kai Wu, Yong Liu, Chengjie Wang, and Feng Zheng. Softpatch: Unsupervised anomaly detection with noisy data. *Advances in Neural Information Processing Systems*, 35:15433–15445, 2022. 4, 5, 6, 7, 8, 9

[5] Zhikang Liu, Yiming Zhou, Yuansheng Xu, and Zilei Wang. Simplenet: A simple network for image anomaly detection and localization. In *Proceedings of the IEEE/CVF Conference on Computer Vision and Pattern Recognition*, pages 20402–20411, 2023. 4, 5, 6, 7, 8, 9

[6] Karsten Roth, Latha Pemula, Joaquin Zepeda, Bernhard Schölkopf, Thomas Brox, and Peter Gehler. Towards total recall in industrial anomaly detection. In *Proceedings of the IEEE/CVF Conference on Computer Vision and Pattern Recognition*, pages 14318–14328, 2022. 4, 5, 6, 7, 8, 9

[7] Zhiyuan You, Lei Cui, Yujun Shen, Kai Yang, Xin Lu, Yu Zheng, and Xinyi Le. A unified model for multi-class anomaly detection. *Advances in Neural Information Processing Systems*, 35:4571–4584, 2022. 4, 5, 6, 7, 8, 9

[8] Xuan Zhang, Shiyu Li, Xi Li, Ping Huang, Jiulong Shan, and Ting Chen. Destseg: Segmentation guided denoising student-teacher for anomaly detection. In *Proceedings of the IEEE/CVF Conference on Computer Vision and Pattern Recognition*, pages 3914–3923, 2023. 4, 5, 6, 7, 8, 9

Table 2. UIAD performance (S-AUROC / I-AUROC / P-AUPRO) comparisons with state-of-the-art anomaly detection methods on multi-view Real-IAD.

| Category          | Embedding-based    |                    |                     |                    | Data-Aug-based      |                    | Reconstruction-based |                    |
|-------------------|--------------------|--------------------|---------------------|--------------------|---------------------|--------------------|----------------------|--------------------|
|                   | PaDim[1]           | CFlow[3]           | PatchCore[6]        | SoftPatch[4]       | SimpleNet[5]        | DeSTSeg[8]         | RD[2]                | UniAD[7]           |
| Audiojack         | 92.2 / 66.6 / 79.5 | 82.0 / 74.3 / 83.4 | 89.3 / 86.3 / 87.6  | 91.0 / 88.5 / 92.5 | 91.2 / 87.4 / 89.3  | 95.3 / 81.8 / 58.8 | 81.9 / 82.4 / 87.7   | 91.2 / 82.8 / 84.0 |
| PCB               | 88.4 / 75.0 / 65.5 | 83.1 / 77.3 / 87.3 | 93.0 / 92.4 / 93.5  | 90.3 / 90.8 / 93.9 | 90.7 / 87.1 / 88.0  | 83.6 / 79.6 / 86.4 | 79.3 / 89.5 / 94.2   | 83.2 / 80.5 / 80.4 |
| Phone Battery     | 91.7 / 81.9 / 83.3 | 91.2 / 84.4 / 92.0 | 95.1 / 91.6 / 91.6  | 91.5 / 90.2 / 83.3 | 94.7 / 88.9 / 72.8  | 98.2 / 86.2 / 77.9 | 89.4 / 90.8 / 95.8   | 93.6 / 83.4 / 87.3 |
| SIM Card Set      | 94.2 / 91.8 / 84.1 | 95.6 / 94.4 / 92.2 | 99.3 / 97.1 / 87.7  | 98.4 / 95.8 / 75.9 | 99.2 / 96.1 / 72.8  | 98.3 / 91.8 / 91.8 | 89.9 / 93.6 / 92.7   | 94.0 / 91.1 / 83.4 |
| Switch            | 82.1 / 80.8 / 88.8 | 92.9 / 83.9 / 87.5 | 94.6 / 89.4 / 93.6  | 97.8 / 94.7 / 96.2 | 98.8 / 94.8 / 93.8  | 96.6 / 92.5 / 94.3 | 87.3 / 87.2 / 93.7   | 95.3 / 85.7 / 90.7 |
| Terminal Block    | 96.9 / 86.7 / 95.1 | 92.2 / 85.1 / 96.4 | 97.5 / 94.1 / 97.1  | 98.2 / 96.2 / 97.8 | 97.7 / 93.4 / 95.0  | 96.1 / 91.4 / 90.2 | 89.8 / 94.5 / 98.6   | 93.8 / 85.9 / 93.1 |
| Toothbrush        | 91.7 / 74.4 / 75.2 | 91.9 / 79.9 / 85.8 | 94.7 / 88.0 / 91.9  | 92.9 / 89.3 / 87.4 | 95.3 / 86.1 / 76.6  | 97.9 / 87.5 / 87.0 | 86.7 / 83.4 / 90.9   | 95.0 / 82.7 / 86.6 |
| Toy               | 91.4 / 82.5 / 72.4 | 78.8 / 67.8 / 81.2 | 92.8 / 87.3 / 91.2  | 91.3 / 86.7 / 91.9 | 92.9 / 82.2 / 77.5  | 96.5 / 82.1 / 78.5 | 75.0 / 81.5 / 92.4   | 77.2 / 67.3 / 74.4 |
| Transistor1       | 90.3 / 86.5 / 88.3 | 96.6 / 92.8 / 94.8 | 99.8 / 97.8 / 97.5  | 99.3 / 97.2 / 97.6 | 99.7 / 97.3 / 95.5  | 99.0 / 95.6 / 96.4 | 94.7 / 95.8 / 97.6   | 99.3 / 94.1 / 92.9 |
| USB               | 77.0 / 69.7 / 76.9 | 86.1 / 78.1 / 83.7 | 93.9 / 90.7 / 95.1  | 93.8 / 91.2 / 96.8 | 93.9 / 90.0 / 93.5  | 93.3 / 90.3 / 89.1 | 89.4 / 92.1 / 96.1   | 83.1 / 80.9 / 85.2 |
| USB Adaptor       | 93.2 / 81.9 / 89.9 | 86.8 / 75.2 / 88.8 | 90.6 / 83.8 / 91.4  | 91.9 / 86.0 / 91.8 | 93.0 / 82.7 / 79.4  | 93.6 / 73.1 / 55.3 | 65.3 / 71.9 / 89.5   | 85.1 / 77.3 / 79.9 |
| Zipper            | 99.3 / 90.4 / 78.5 | 97.6 / 93.8 / 94.2 | 100.0 / 98.1 / 90.8 | 99.6 / 97.9 / 90.9 | 99.7 / 98.2 / 92.4  | 99.7 / 98.4 / 99.0 | 96.1 / 97.8 / 98.0   | 98.8 / 98.2 / 94.7 |
| Bottle Cap        | 98.1 / 87.7 / 91.9 | 98.8 / 91.3 / 95.4 | 99.4 / 94.3 / 93.0  | 99.1 / 95.9 / 96.8 | 99.4 / 91.6 / 88.2  | 92.4 / 87.1 / 83.4 | 93.7 / 89.2 / 97.0   | 97.3 / 89.8 / 93.8 |
| End Cap           | 76.1 / 73.7 / 85.7 | 75.1 / 66.4 / 87.2 | 91.9 / 84.1 / 92.2  | 92.3 / 85.8 / 93.6 | 94.2 / 83.4 / 82.9  | 82.3 / 80.3 / 81.6 | 68.1 / 79.0 / 93.4   | 89.4 / 80.4 / 85.6 |
| Fire Hood         | 96.9 / 77.3 / 72.7 | 87.0 / 80.5 / 93.5 | 89.3 / 84.1 / 88.6  | 87.8 / 84.3 / 89.2 | 95.6 / 81.8 / 82.7  | 96.9 / 78.9 / 62.7 | 81.4 / 84.3 / 91.7   | 83.0 / 79.5 / 84.5 |
| Mounts            | 98.4 / 82.5 / 89.1 | 98.2 / 85.3 / 95.6 | 99.7 / 88.0 / 91.3  | 99.3 / 85.9 / 89.6 | 99.4 / 88.2 / 89.2  | 99.1 / 85.1 / 68.6 | 92.5 / 85.7 / 94.6   | 97.0 / 87.2 / 94.3 |
| Plastic Nut       | 98.2 / 73.8 / 87.4 | 88.6 / 79.8 / 94.1 | 97.8 / 90.8 / 95.4  | 95.7 / 89.3 / 96.2 | 95.7 / 89.3 / 90.6  | 94.4 / 90.2 / 81.3 | 72.8 / 85.0 / 96.7   | 87.1 / 79.3 / 87.2 |
| Plastic Plug      | 87.4 / 80.0 / 86.7 | 90.0 / 83.9 / 93.3 | 95.7 / 89.7 / 92.2  | 92.5 / 88.7 / 92.9 | 94.4 / 87.1 / 84.4  | 95.6 / 86.0 / 74.4 | 89.3 / 90.5 / 96.3   | 78.0 / 78.2 / 87.7 |
| Regulator         | 96.5 / 76.5 / 85.1 | 85.1 / 62.9 / 85.0 | 86.0 / 81.9 / 95.7  | 82.9 / 82.1 / 95.1 | 92.0 / 82.2 / 88.7  | 93.0 / 89.8 / 79.9 | 92.5 / 87.3 / 97.0   | 55.5 / 51.8 / 70.3 |
| Rolled Strip Base | 98.6 / 97.4 / 96.1 | 98.8 / 97.1 / 98.4 | 99.7 / 98.9 / 98.3  | 99.7 / 99.1 / 99.0 | 99.6 / 99.4 / 95.7  | 98.9 / 98.3 / 98.5 | 80.3 / 94.3 / 98.5   | 99.3 / 98.6 / 97.7 |
| Toy Brick         | 84.3 / 71.0 / 76.9 | 82.9 / 80.7 / 88.7 | 82.6 / 81.4 / 83.6  | 78.2 / 79.8 / 85.7 | 85.7 / 80.8 / 75.7  | 87.0 / 76.8 / 70.0 | 72.5 / 73.9 / 88.7   | 78.3 / 77.9 / 82.3 |
| U Block           | 98.3 / 84.1 / 89.8 | 96.7 / 90.5 / 96.7 | 98.8 / 91.9 / 96.8  | 98.3 / 91.6 / 96.5 | 98.5 / 90.7 / 91.7  | 98.5 / 90.1 / 81.4 | 86.9 / 91.7 / 97.1   | 96.3 / 88.8 / 94.0 |
| Vcpill            | 94.7 / 67.4 / 80.1 | 87.8 / 85.8 / 93.5 | 96.5 / 91.4 / 93.5  | 93.7 / 89.6 / 88.7 | 97.5 / 91.1 / 85.2  | 96.4 / 90.0 / 89.2 | 87.2 / 90.2 / 94.3   | 89.4 / 88.6 / 94.2 |
| Wooden Beads      | 91.1 / 82.4 / 78.3 | 89.3 / 87.4 / 89.4 | 91.4 / 88.6 / 87.3  | 90.9 / 89.2 / 87.9 | 92.9 / 85.7 / 81.6  | 91.9 / 86.2 / 82.7 | 85.0 / 87.4 / 89.2   | 82.5 / 80.7 / 83.0 |
| Woodstick         | 81.8 / 79.9 / 78.8 | 83.9 / 78.9 / 89.0 | 74.5 / 77.2 / 69.1  | 73.9 / 76.0 / 70.8 | 81.5 / 77.9 / 71.7  | 90.2 / 89.0 / 79.2 | 71.9 / 84.2 / 91.6   | 76.0 / 78.9 / 77.2 |
| Tape              | 99.8 / 93.7 / 96.4 | 98.5 / 96.0 / 98.8 | 99.9 / 98.2 / 97.9  | 99.7 / 97.9 / 97.9 | 100.0 / 96.9 / 95.4 | 99.1 / 96.1 / 92.8 | 89.5 / 93.1 / 98.7   | 99.1 / 97.2 / 97.6 |
| Porcelain Doll    | 93.8 / 74.3 / 75.2 | 95.1 / 76.0 / 95.4 | 96.1 / 88.2 / 94.3  | 94.7 / 86.1 / 93.4 | 96.2 / 86.1 / 86.0  | 94.6 / 83.7 / 68.7 | 89.6 / 87.8 / 95.1   | 92.8 / 84.1 / 91.7 |
| Mint              | 69.1 / 66.9 / 61.4 | 79.1 / 70.7 / 75.1 | 85.7 / 76.2 / 81.4  | 82.1 / 74.5 / 80.8 | 86.8 / 77.2 / 66.0  | 77.7 / 70.5 / 71.2 | 67.7 / 71.6 / 79.9   | 73.0 / 67.6 / 60.2 |
| Eraser            | 96.5 / 86.7 / 90.7 | 87.2 / 88.1 / 97.0 | 95.6 / 93.4 / 96.1  | 96.1 / 93.5 / 95.9 | 94.7 / 91.2 / 90.0  | 91.9 / 88.2 / 83.3 | 82.9 / 89.2 / 96.8   | 91.2 / 89.6 / 93.8 |
| Button Battery    | 88.7 / 84.8 / 54.1 | 96.3 / 85.2 / 82.3 | 90.6 / 87.3 / 88.2  | 91.9 / 88.5 / 78.9 | 95.8 / 88.8 / 64.0  | 93.3 / 91.2 / 90.4 | 83.3 / 87.0 / 91.1   | 87.5 / 79.0 / 75.8 |
| Average All       | 91.2 / 80.3 / 81.8 | 89.8 / 82.5 / 90.5 | 93.7 / 89.4 / 91.5  | 92.8 / 89.4 / 90.8 | 94.9 / 88.5 / 84.6  | 94.0 / 86.9 / 81.5 | 83.7 / 87.1 / 93.8   | 88.1 / 82.9 / 86.1 |

Table 3. FUIAD performance (S-AUROC / I-AUROC / P-AUPRO) comparisons with state-of-the-art anomaly detection methods on multi-view Real-IAD with a noisy ratio of 0.

| Category          | Embedding-based    |                    |                     |                     | Data-Aug-based      |                    | Reconstruction-based |                    |
|-------------------|--------------------|--------------------|---------------------|---------------------|---------------------|--------------------|----------------------|--------------------|
|                   | PaDim[1]           | CFlow[3]           | PatchCore[6]        | SoftPatch[4]        | SimpleNet[5]        | DeSTSeg[8]         | RD[2]                | UniAD[7]           |
| Audiojack         | 96.0 / 74.1 / 83.5 | 80.4 / 78.0 / 87.1 | 93.0 / 89.0 / 89.7  | 93.0 / 90.4 / 92.9  | 94.7 / 90.4 / 89.7  | 96.7 / 85.4 / 88.6 | 84.6 / 86.6 / 90.9   | 95.0 / 87.1 / 86.6 |
| PCB               | 92.0 / 79.8 / 70.0 | 81.7 / 78.3 / 87.0 | 94.4 / 94.1 / 94.1  | 94.4 / 94.2 / 95.7  | 93.9 / 89.4 / 90.3  | 94.0 / 92.9 / 91.9 | 94.3 / 94.0 / 94.2   | 87.8 / 85.8 / 84.1 |
| Phone Battery     | 92.0 / 86.0 / 87.3 | 97.4 / 86.3 / 94.0 | 96.4 / 92.7 / 94.2  | 95.3 / 92.7 / 86.2  | 98.3 / 90.1 / 70.3  | 98.4 / 89.7 / 94.0 | 80.4 / 91.4 / 97.7   | 92.6 / 87.6 / 91.5 |
| SIM Card Set      | 95.0 / 95.2 / 89.1 | 91.7 / 91.9 / 93.7 | 98.8 / 98.7 / 91.7  | 98.0 / 97.9 / 79.8  | 98.4 / 97.6 / 72.5  | 96.1 / 93.9 / 90.5 | 85.2 / 95.5 / 94.4   | 94.4 / 94.1 / 85.9 |
| Switch            | 83.0 / 81.9 / 89.5 | 92.5 / 87.6 / 89.4 | 94.7 / 89.6 / 93.8  | 98.4 / 96.1 / 96.7  | 98.8 / 94.8 / 94.2  | 97.2 / 94.5 / 94.2 | 91.7 / 91.8 / 94.7   | 95.6 / 88.3 / 92.3 |
| Terminal Block    | 95.6 / 91.6 / 95.8 | 92.6 / 89.0 / 95.9 | 97.1 / 95.2 / 97.3  | 97.6 / 96.4 / 97.8  | 96.5 / 94.1 / 95.1  | 97.3 / 94.9 / 96.9 | 85.0 / 94.6 / 98.6   | 96.0 / 89.6 / 94.1 |
| Toothbrush        | 93.6 / 77.0 / 77.1 | 96.0 / 82.9 / 86.1 | 95.1 / 88.7 / 92.6  | 92.8 / 90.0 / 88.9  | 94.6 / 87.1 / 76.1  | 99.0 / 89.6 / 85.2 | 77.8 / 83.2 / 92.1   | 94.9 / 83.7 / 88.2 |
| Toy               | 92.7 / 88.9 / 75.8 | 73.0 / 65.2 / 78.4 | 95.5 / 90.5 / 92.3  | 94.2 / 90.0 / 92.6  | 94.8 / 85.0 / 73.6  | 98.0 / 88.4 / 77.5 | 84.9 / 86.5 / 93.2   | 78.7 / 69.0 / 77.4 |
| Transistor1       | 95.6 / 90.7 / 90.8 | 99.6 / 95.8 / 95.8 | 99.9 / 98.4 / 98.0  | 99.8 / 97.9 / 98.0  | 100.0 / 97.7 / 95.7 | 99.3 / 95.5 / 90.0 | 99.9 / 98.2 / 97.8   | 99.6 / 95.5 / 94.2 |
| USB               | 80.5 / 74.4 / 82.5 | 79.4 / 78.2 / 87.9 | 95.4 / 93.9 / 96.4  | 94.2 / 94.0 / 98.1  | 94.3 / 94.1 / 94.6  | 93.9 / 92.8 / 93.9 | 85.7 / 93.2 / 97.4   | 84.2 / 84.4 / 88.4 |
| USB Adaptor       | 92.7 / 85.8 / 91.7 | 87.4 / 76.0 / 89.3 | 90.1 / 84.2 / 92.0  | 92.6 / 88.6 / 92.3  | 90.9 / 84.5 / 79.5  | 93.6 / 82.9 / 85.7 | 75.1 / 75.7 / 90.6   | 86.8 / 81.3 / 84.1 |
| Zipper            | 99.3 / 92.1 / 80.5 | 97.7 / 96.4 / 93.7 | 100.0 / 97.9 / 91.0 | 99.8 / 97.5 / 91.2  | 99.8 / 98.0 / 91.2  | 99.7 / 99.2 / 95.0 | 90.7 / 97.5 / 98.4   | 99.0 / 98.3 / 96.2 |
| Bottle Cap        | 98.5 / 93.2 / 95.5 | 98.5 / 93.6 / 97.0 | 99.3 / 96.8 / 94.5  | 99.4 / 97.6 / 98.3  | 98.2 / 94.6 / 93.4  | 97.2 / 91.4 / 92.1 | 92.0 / 94.9 / 98.0   | 99.2 / 94.4 / 96.5 |
| End Cap           | 79.1 / 74.6 / 85.7 | 79.3 / 68.1 / 85.3 | 94.4 / 85.8 / 92.4  | 95.1 / 87.8 / 93.9  | 95.9 / 84.3 / 76.2  | 88.2 / 83.7 / 81.4 | 66.1 / 76.1 / 93.7   | 91.1 / 80.7 / 84.3 |
| Fire Hood         | 97.8 / 84.2 / 76.4 | 87.8 / 84.3 / 93.6 | 88.3 / 85.4 / 90.0  | 87.9 / 86.2 / 91.1  | 93.2 / 82.0 / 80.4  | 92.0 / 85.5 / 88.1 | 68.8 / 82.1 / 93.3   | 81.4 / 79.9 / 86.4 |
| Mounts            | 99.4 / 87.2 / 88.2 | 98.6 / 88.8 / 95.7 | 100.0 / 91.1 / 90.1 | 100.0 / 90.0 / 87.9 | 99.5 / 89.6 / 89.4  | 99.7 / 87.3 / 87.4 | 86.7 / 88.8 / 94.4   | 97.8 / 89.5 / 93.5 |
| Plastic Nut       | 98.8 / 79.3 / 89.4 | 89.7 / 82.1 / 92.9 | 98.9 / 94.7 / 96.1  | 96.6 / 93.6 / 96.9  | 96.3 / 93.0 / 90.2  | 93.7 / 92.7 / 96.4 | 93.2 / 92.5 / 96.9   | 89.0 / 82.7 / 89.4 |
| Plastic Plug      | 85.7 / 85.9 / 87.5 | 82.7 / 81.4 / 94.1 | 93.4 / 92.9 / 94.0  | 91.1 / 91.6 / 94.7  | 95.4 / 90.6 / 84.1  | 93.4 / 90.7 / 92.9 | 91.7 / 93.7 / 96.3   | 83.4 / 83.5 / 87.9 |
| Regulator         | 97.8 / 83.1 / 86.7 | 81.0 / 66.3 / 83.0 | 90.7 / 86.4 / 96.9  | 89.8 / 86.3 / 96.5  | 94.3 / 81.8 / 85.0  | 99.0 / 92.6 / 95.2 | 93.4 / 89.4 / 98.3   | 64.7 / 61.0 / 74.3 |
| Rolled Strip Base | 98.9 / 98.0 / 97.3 | 97.9 / 95.9 / 98.9 | 99.4 / 99.0 / 98.9  | 99.6 / 99.3 / 99.2  | 99.6 / 99.3 / 96.8  | 98.8 / 98.7 / 98.0 | 98.2 / 97.0 / 98.7   | 99.1 / 98.5 / 98.2 |
| Toy Brick         | 88.3 / 73.2 / 77.0 | 81.6 / 79.3 / 88.1 | 87.1 / 83.5 / 84.8  | 82.9 / 81.1 / 87.0  | 82.6 / 74.9 / 66.4  | 73.9 / 69.4 / 60.1 | 78.3 / 78.7 / 89.0   | 81.2 / 77.6 / 82.5 |
| U Block           | 98.0 / 88.2 / 92.1 | 95.6 / 91.8 / 95.5 | 98.2 / 93.7 / 97.0  | 97.4 / 93.2 / 96.8  | 97.7 / 93.1 / 92.5  | 98.7 / 89.3 / 93.6 | 85.8 / 92.6 / 98.1   | 95.1 / 91.2 / 94.0 |
| Vcpill            | 93.9 / 73.4 / 82.6 | 87.7 / 88.1 / 94.0 | 96.0 / 92.4 / 94.6  | 94.2 / 90.5 / 90.5  | 97.8 / 91.6 / 85.9  | 97.0 / 89.1 / 81.5 | 96.0 / 89.9 / 95.7   | 86.5 / 87.7 / 93.9 |
| Wooden Beads      | 92.7 / 89.8 / 84.8 | 89.9 / 90.9 / 90.8 | 89.4 / 89.7 / 89.2  | 89.2 / 90.1 / 89.9  | 90.0 / 87.1 / 82.7  | 88.7 / 88.2 / 88.2 | 83.6 / 88.9 / 91.6   | 81.9 / 81.6 / 85.6 |
| Woodstick         | 83.7 / 82.9 / 79.8 | 80.2 / 80.8 / 88.7 | 75.5 / 81.1 / 71.0  | 74.8 / 80.6 / 73.3  | 79.7 / 82.1 / 71.6  | 89.1 / 88.9 / 90.3 | 61.9 / 84.4 / 92.8   | 79.1 / 82.9 / 78.4 |
| Tape              | 99.8 / 95.7 / 96.9 | 96.8 / 94.7 / 99.3 | 99.7 / 98.8 / 98.0  | 99.6 / 98.5 / 98.0  | 99.9 / 97.6 / 96.3  | 99.7 / 96.4 / 98.3 | 97.2 / 98.2 / 99.3   | 99.6 / 98.2 / 98.6 |
| Porcelain Doll    | 96.3 / 81.0 / 80.2 | 91.0 / 79.9 / 95.4 | 96.7 / 91.0 / 96.1  | 95.8 / 88.2 / 95.4  | 98.3 / 90.0 / 88.4  | 95.9 / 87.1 / 90.7 | 95.1 / 89.4 / 96.9   | 94.0 / 86.8 / 93.4 |
| Mint              | 76.7 / 71.2 / 64.0 | 79.7 / 71.4 / 71.6 | 90.7 / 80.2 / 83.2  | 88.2 / 77.5 / 83.1  | 91.0 / 81.7 / 64.6  | 85.4 / 78.0 / 64.0 | 70.6 / 74.5 / 86.4   | 79.2 / 70.0 / 57.8 |
| Eraser            | 96.8 / 90.7 / 94.2 | 86.0 / 89.2 / 98.2 | 95.4 / 94.9 / 98.1  | 95.0 / 95.3 / 97.7  | 93.5 / 92.0 / 86.4  | 94.5 / 91.2 / 93.4 | 89.4 / 92.7 / 97.8   | 90.4 / 91.6 / 94.8 |
| Button Battery    | 90.6 / 89.2 / 59.1 | 90.2 / 84.0 / 78.6 | 87.9 / 87.5 / 90.0  | 90.3 / 89.2 / 82.3  | 90.4 / 86.0 / 62.7  | 89.0 / 87.2 / 85.4 | 82.7 / 86.8 / 91.9   | 92.1 / 80.7 / 76.0 |
| Average All       | 92.7 / 84.6 / 84.4 | 88.8 / 83.9 / 90.6 | 94.4 / 91.3 / 92.6  | 93.9 / 91.4 / 92.1  | 94.9 / 89.8 / 83.9  | 94.6 / 89.6 / 88.7 | 85.5 / 89.3 / 95.0   | 89.6 / 85.4 / 87.6 |

FUIAD-NR-0.0



Table 4. FUIAD performance (S-AUROC / I-AUROC / P-AUPRO) comparisons with state-of-the-art anomaly detection methods on multi-view Real-IAD with a noisy ratio of 0.1.

| Category          | Embedding-based    |                    |                    |                     | Data-Aug-based     |                    | Reconstruction-based |                    |
|-------------------|--------------------|--------------------|--------------------|---------------------|--------------------|--------------------|----------------------|--------------------|
|                   | PaDim[1]           | CFlow[3]           | PatchCore[6]       | SoftPatch[4]        | SimpleNet[5]       | DeSTSeg[8]         | RD[2]                | UniAD[7]           |
| Audiojack         | 89.2 / 74.3 / 86.1 | 75.8 / 71.8 / 86.9 | 88.2 / 87.1 / 89.6 | 88.0 / 88.7 / 93.1  | 84.0 / 84.1 / 85.1 | 88.8 / 87.6 / 90.6 | 71.6 / 85.8 / 91.3   | 88.5 / 85.2 / 85.8 |
| PCB               | 84.8 / 76.0 / 71.7 | 79.9 / 74.8 / 86.6 | 93.9 / 93.5 / 94.3 | 91.9 / 93.3 / 95.9  | 84.3 / 83.0 / 87.1 | 87.5 / 85.7 / 87.8 | 90.6 / 91.3 / 94.1   | 85.2 / 83.5 / 83.9 |
| Phone Battery     | 80.3 / 85.4 / 90.0 | 86.7 / 86.1 / 94.6 | 90.1 / 92.5 / 95.8 | 93.4 / 93.0 / 89.0  | 80.9 / 81.8 / 74.7 | 76.5 / 85.6 / 88.2 | 74.4 / 89.2 / 98.0   | 82.7 / 87.6 / 92.8 |
| SIM Card Set      | 88.2 / 92.5 / 93.8 | 88.3 / 90.2 / 93.9 | 94.9 / 97.1 / 97.1 | 96.0 / 96.4 / 91.9  | 89.6 / 85.4 / 62.9 | 81.9 / 82.2 / 87.2 | 67.7 / 91.0 / 96.2   | 90.2 / 91.8 / 87.5 |
| Switch            | 77.5 / 78.3 / 89.7 | 40.4 / 68.3 / 86.3 | 94.2 / 89.5 / 93.4 | 98.3 / 95.6 / 96.7  | 95.5 / 87.9 / 88.4 | 94.4 / 90.1 / 92.4 | 64.2 / 83.4 / 93.4   | 94.8 / 86.8 / 92.2 |
| Terminal Block    | 94.2 / 91.9 / 97.3 | 89.5 / 86.8 / 96.3 | 96.8 / 95.5 / 98.2 | 97.5 / 97.0 / 98.4  | 97.4 / 90.2 / 93.5 | 96.8 / 93.2 / 97.2 | 93.4 / 96.4 / 99.0   | 95.4 / 89.2 / 95.0 |
| Toothbrush        | 74.8 / 72.8 / 79.4 | 77.9 / 78.1 / 86.5 | 87.9 / 89.0 / 93.3 | 90.1 / 90.8 / 89.7  | 82.7 / 82.5 / 72.9 | 88.5 / 82.1 / 72.6 | 74.4 / 81.5 / 91.7   | 92.2 / 83.3 / 88.3 |
| Toy               | 76.5 / 71.3 / 81.3 | 66.7 / 58.6 / 76.7 | 93.1 / 87.9 / 92.2 | 93.4 / 89.1 / 92.7  | 86.1 / 74.7 / 72.2 | 86.3 / 82.7 / 77.7 | 77.1 / 84.7 / 93.5   | 76.5 / 68.0 / 77.8 |
| Transistor1       | 83.0 / 85.6 / 92.7 | 96.4 / 91.1 / 94.7 | 99.5 / 97.1 / 97.9 | 99.3 / 96.9 / 98.0  | 96.8 / 89.7 / 89.9 | 97.3 / 92.6 / 90.1 | 99.6 / 97.3 / 98.3   | 99.4 / 93.9 / 93.8 |
| USB               | 67.8 / 68.6 / 82.3 | 76.3 / 76.1 / 86.5 | 93.3 / 92.6 / 96.5 | 93.8 / 94.0 / 98.0  | 89.6 / 85.7 / 90.7 | 92.8 / 89.8 / 93.4 | 93.5 / 94.5 / 97.3   | 80.5 / 80.7 / 88.1 |
| USB Adaptor       | 88.6 / 83.9 / 92.6 | 79.4 / 71.1 / 89.8 | 87.8 / 79.4 / 92.8 | 92.6 / 88.1 / 93.2  | 87.8 / 81.1 / 83.7 | 87.7 / 80.5 / 88.1 | 81.2 / 77.5 / 91.8   | 85.2 / 79.0 / 83.7 |
| Zipper            | 97.2 / 89.9 / 81.6 | 89.9 / 88.2 / 94.7 | 99.8 / 97.6 / 91.3 | 99.4 / 97.2 / 91.3  | 96.9 / 91.2 / 83.2 | 90.4 / 88.7 / 85.0 | 99.1 / 98.6 / 98.2   | 97.8 / 97.6 / 96.3 |
| Bottle Cap        | 97.3 / 94.0 / 97.2 | 98.8 / 92.9 / 98.2 | 99.4 / 96.7 / 97.8 | 99.4 / 97.6 / 98.6  | 93.5 / 88.3 / 89.4 | 96.0 / 92.8 / 95.9 | 98.7 / 95.6 / 98.2   | 99.0 / 93.9 / 96.7 |
| End Cap           | 73.3 / 71.9 / 85.4 | 71.0 / 67.1 / 83.1 | 92.7 / 83.5 / 91.8 | 95.0 / 87.6 / 93.6  | 88.3 / 74.7 / 69.1 | 81.5 / 78.2 / 87.9 | 63.7 / 79.1 / 93.3   | 88.8 / 79.0 / 83.8 |
| Fire Hood         | 84.5 / 78.4 / 78.4 | 83.4 / 80.4 / 94.1 | 86.3 / 84.6 / 90.0 | 86.5 / 86.2 / 91.1  | 81.5 / 78.2 / 69.5 | 85.7 / 82.1 / 83.4 | 72.8 / 83.6 / 93.5   | 80.7 / 79.3 / 85.9 |
| Mounts            | 97.7 / 87.8 / 89.2 | 96.5 / 88.8 / 95.6 | 99.8 / 93.1 / 90.2 | 100.0 / 90.6 / 88.7 | 92.6 / 83.8 / 86.3 | 97.6 / 87.6 / 89.4 | 81.7 / 90.3 / 93.6   | 97.5 / 89.9 / 94.3 |
| Plastic Nut       | 84.1 / 80.7 / 91.1 | 84.3 / 82.0 / 94.1 | 97.9 / 93.5 / 96.1 | 96.2 / 93.7 / 96.9  | 87.7 / 85.2 / 76.8 | 91.1 / 90.3 / 95.2 | 90.8 / 89.9 / 97.2   | 87.5 / 80.7 / 90.0 |
| Plastic Plug      | 81.6 / 85.0 / 89.4 | 89.9 / 87.7 / 93.6 | 92.3 / 93.0 / 96.0 | 90.5 / 92.2 / 95.8  | 89.8 / 84.9 / 78.1 | 92.1 / 86.7 / 86.5 | 92.4 / 93.3 / 96.7   | 79.3 / 81.5 / 88.2 |
| Regulator         | 82.7 / 75.4 / 90.1 | 65.0 / 65.2 / 84.3 | 84.4 / 86.1 / 96.9 | 85.8 / 85.1 / 96.8  | 84.4 / 81.3 / 86.5 | 92.2 / 88.1 / 88.1 | 85.6 / 87.2 / 98.0   | 63.3 / 58.9 / 73.1 |
| Rolled Strip Base | 97.6 / 97.1 / 98.2 | 96.8 / 91.3 / 98.9 | 99.3 / 98.6 / 98.9 | 99.7 / 99.3 / 99.2  | 97.5 / 95.0 / 93.2 | 94.3 / 94.5 / 97.1 | 98.6 / 97.0 / 98.9   | 98.8 / 98.2 / 98.3 |
| Toy Brick         | 85.0 / 71.7 / 78.8 | 72.7 / 72.6 / 89.0 | 84.2 / 81.6 / 85.2 | 81.6 / 81.0 / 87.3  | 72.6 / 66.7 / 56.7 | 84.7 / 76.5 / 76.5 | 73.0 / 72.7 / 88.3   | 80.0 / 76.8 / 83.1 |
| U Block           | 95.8 / 88.8 / 94.7 | 91.2 / 89.3 / 96.8 | 96.4 / 94.8 / 97.7 | 97.0 / 94.1 / 97.3  | 89.3 / 88.4 / 88.1 | 82.5 / 82.3 / 92.6 | 94.1 / 93.6 / 98.3   | 94.2 / 90.5 / 93.6 |
| Vcpill            | 85.4 / 71.1 / 83.9 | 82.5 / 84.3 / 93.7 | 94.5 / 92.0 / 94.6 | 93.3 / 89.9 / 90.5  | 89.6 / 85.3 / 78.5 | 90.8 / 85.6 / 82.2 | 90.1 / 76.1 / 94.9   | 82.2 / 86.3 / 93.9 |
| Wooden Beads      | 89.4 / 88.6 / 87.5 | 89.1 / 89.9 / 91.1 | 85.0 / 87.9 / 89.5 | 88.6 / 89.2 / 90.1  | 83.6 / 82.4 / 77.9 | 82.5 / 81.4 / 76.3 | 57.4 / 82.8 / 91.8   | 79.2 / 79.6 / 84.9 |
| Woodstick         | 79.1 / 82.1 / 79.8 | 73.2 / 73.6 / 89.4 | 73.9 / 80.8 / 70.8 | 74.3 / 79.9 / 72.4  | 74.6 / 74.4 / 71.3 | 82.4 / 87.5 / 88.4 | 81.6 / 88.7 / 93.8   | 76.9 / 81.9 / 78.3 |
| Tape              | 97.3 / 96.7 / 97.4 | 96.5 / 96.7 / 99.2 | 98.6 / 98.3 / 98.1 | 99.5 / 98.7 / 98.0  | 93.7 / 91.5 / 89.5 | 89.9 / 93.8 / 97.9 | 97.0 / 98.2 / 99.4   | 99.2 / 97.9 / 98.6 |
| Porcelain Doll    | 90.6 / 80.5 / 83.7 | 81.5 / 76.9 / 95.9 | 95.9 / 90.7 / 96.7 | 94.8 / 88.5 / 96.1  | 94.0 / 87.1 / 89.1 | 89.2 / 83.2 / 86.0 | 94.0 / 90.4 / 97.7   | 92.5 / 86.3 / 93.5 |
| Mint              | 72.7 / 69.9 / 64.8 | 80.2 / 71.0 / 73.9 | 88.9 / 79.4 / 83.5 | 87.6 / 75.9 / 84.0  | 86.9 / 75.8 / 63.6 | 81.1 / 73.3 / 61.7 | 87.1 / 76.9 / 87.6   | 79.2 / 70.3 / 58.6 |
| Eraser            | 93.6 / 90.3 / 96.0 | 87.0 / 91.1 / 98.0 | 93.9 / 94.5 / 98.4 | 94.8 / 94.8 / 97.8  | 84.3 / 86.7 / 83.8 | 87.3 / 89.0 / 92.9 | 75.5 / 90.1 / 97.7   | 89.6 / 92.0 / 94.7 |
| Button Battery    | 75.8 / 75.7 / 67.4 | 66.7 / 68.4 / 78.4 | 83.1 / 83.8 / 90.1 | 85.1 / 84.2 / 86.4  | 78.5 / 72.9 / 63.8 | 73.8 / 74.6 / 79.8 | 84.0 / 84.9 / 91.7   | 80.3 / 75.2 / 75.5 |
| Average All       | 85.5 / 81.9 / 86.4 | 81.8 / 80.3 / 90.7 | 92.2 / 90.4 / 93.2 | 92.8 / 90.9 / 92.9  | 87.8 / 83.3 / 79.9 | 88.1 / 85.6 / 86.9 | 83.5 / 88.1 / 95.1   | 87.2 / 84.2 / 87.7 |

FUAD-NR-0.1

Table 5. FUIAD performance (S-AUROC / I-AUROC / P-AUPRO) comparisons with state-of-the-art anomaly detection methods on multi-view Real-IAD with a noisy ratio of 0.2.

| Category          | Embedding-based    |                    |                    |                     | Data-Aug-based     |                    | Reconstruction-based |                    |
|-------------------|--------------------|--------------------|--------------------|---------------------|--------------------|--------------------|----------------------|--------------------|
|                   | PaDim[1]           | CFlow[3]           | PatchCore[6]       | SoftPatch[4]        | SimpleNet[5]       | DeSTSeg[8]         | RD[2]                | UniAD[7]           |
| Audiojack         | 86.6 / 73.8 / 86.8 | 66.6 / 67.5 / 87.2 | 84.8 / 85.9 / 88.8 | 86.8 / 87.6 / 92.8  | 76.7 / 80.8 / 81.4 | 80.1 / 84.1 / 87.6 | 78.3 / 85.3 / 90.9   | 81.4 / 83.6 / 85.1 |
| PCB               | 81.7 / 72.4 / 72.0 | 77.6 / 72.5 / 84.0 | 92.3 / 92.5 / 94.3 | 91.6 / 92.9 / 95.7  | 82.0 / 80.4 / 84.8 | 76.9 / 80.1 / 94.5 | 83.6 / 89.0 / 94.4   | 83.6 / 81.9 / 83.8 |
| Phone Battery     | 75.9 / 83.5 / 89.7 | 82.6 / 81.3 / 93.8 | 84.7 / 91.0 / 95.9 | 92.6 / 92.1 / 88.8  | 77.9 / 79.4 / 69.2 | 80.1 / 86.7 / 90.5 | 78.1 / 88.9 / 98.0   | 78.6 / 85.8 / 92.6 |
| SIM Card Set      | 85.8 / 91.0 / 94.2 | 88.9 / 91.3 / 94.2 | 94.5 / 96.8 / 97.2 | 95.6 / 95.7 / 91.4  | 88.1 / 84.5 / 57.9 | 70.9 / 71.6 / 78.2 | 78.9 / 93.6 / 96.6   | 87.0 / 90.0 / 87.3 |
| Switch            | 75.0 / 75.5 / 89.2 | 77.2 / 74.4 / 87.0 | 93.3 / 89.0 / 93.3 | 98.2 / 95.4 / 96.6  | 92.2 / 85.1 / 86.7 | 92.7 / 84.2 / 79.5 | 67.0 / 81.8 / 93.2   | 94.0 / 85.5 / 91.8 |
| Terminal Block    | 92.9 / 90.7 / 97.5 | 86.5 / 83.8 / 96.0 | 96.8 / 95.2 / 98.3 | 98.0 / 97.0 / 98.5  | 90.7 / 85.1 / 88.8 | 89.1 / 86.6 / 97.4 | 94.7 / 96.4 / 99.1   | 95.4 / 89.1 / 95.4 |
| Toothbrush        | 69.3 / 69.8 / 79.0 | 83.4 / 77.9 / 87.1 | 86.6 / 87.5 / 93.2 | 88.9 / 89.5 / 89.5  | 75.2 / 71.6 / 63.6 | 84.1 / 72.8 / 65.0 | 78.9 / 82.3 / 91.1   | 89.3 / 81.7 / 88.2 |
| Toy               | 70.6 / 65.9 / 81.6 | 64.3 / 58.9 / 78.5 | 91.5 / 86.0 / 91.5 | 93.0 / 88.0 / 92.5  | 78.8 / 69.7 / 69.2 | 85.3 / 77.8 / 76.1 | 76.6 / 84.0 / 93.1   | 74.1 / 66.9 / 78.0 |
| Transistor1       | 76.7 / 82.1 / 92.6 | 96.6 / 91.4 / 95.2 | 99.1 / 96.5 / 97.8 | 97.7 / 95.6 / 97.6  | 90.8 / 82.3 / 81.9 | 93.1 / 83.6 / 74.4 | 99.2 / 95.9 / 98.0   | 99.1 / 92.7 / 93.7 |
| USB               | 62.4 / 66.2 / 82.0 | 77.2 / 77.6 / 87.5 | 92.2 / 92.1 / 96.5 | 93.8 / 93.6 / 98.0  | 81.7 / 82.3 / 86.9 | 82.7 / 84.8 / 89.6 | 93.3 / 94.3 / 97.0   | 80.4 / 80.9 / 87.7 |
| USB Adaptor       | 85.8 / 81.9 / 92.5 | 76.0 / 73.2 / 88.8 | 85.7 / 76.8 / 92.7 | 91.5 / 88.0 / 93.1  | 70.8 / 70.5 / 73.4 | 85.9 / 80.4 / 89.8 | 55.3 / 70.7 / 90.3   | 83.0 / 76.7 / 81.5 |
| Zipper            | 95.2 / 88.1 / 80.9 | 88.4 / 85.3 / 95.3 | 99.6 / 97.3 / 91.4 | 99.0 / 96.9 / 91.4  | 91.0 / 86.0 / 74.6 | 88.1 / 84.6 / 76.8 | 76.5 / 92.3 / 98.1   | 97.0 / 96.9 / 96.2 |
| Bottle Cap        | 96.7 / 93.3 / 97.3 | 96.3 / 93.0 / 98.0 | 98.9 / 96.6 / 98.0 | 99.3 / 97.7 / 98.7  | 87.4 / 84.5 / 86.2 | 91.2 / 91.9 / 97.0 | 92.1 / 93.5 / 98.4   | 98.0 / 93.6 / 96.7 |
| End Cap           | 69.4 / 69.9 / 84.7 | 70.4 / 68.2 / 82.4 | 90.3 / 82.0 / 91.5 | 93.7 / 86.3 / 93.4  | 80.0 / 72.4 / 62.5 | 80.7 / 79.0 / 84.3 | 68.2 / 76.2 / 93.6   | 86.9 / 77.8 / 83.1 |
| Fire Hood         | 80.3 / 76.6 / 78.7 | 85.0 / 84.2 / 95.0 | 83.8 / 83.8 / 89.8 | 85.2 / 85.6 / 91.0  | 75.0 / 76.9 / 76.9 | 86.8 / 81.6 / 85.3 | 73.0 / 82.6 / 93.1   | 79.9 / 78.9 / 85.9 |
| Mounts            | 96.0 / 88.1 / 89.6 | 97.8 / 89.6 / 95.6 | 99.0 / 93.0 / 88.2 | 100.0 / 92.2 / 88.7 | 92.1 / 83.1 / 82.3 | 85.2 / 78.9 / 81.6 | 89.2 / 90.2 / 93.6   | 96.5 / 90.4 / 94.2 |
| Plastic Nut       | 80.0 / 79.5 / 91.5 | 85.4 / 83.3 / 93.5 | 97.4 / 93.3 / 96.2 | 95.5 / 93.1 / 97.0  | 87.4 / 81.1 / 79.0 | 81.3 / 83.5 / 89.3 | 74.7 / 87.0 / 96.8   | 82.8 / 77.2 / 89.0 |
| Plastic Plug      | 79.5 / 83.7 / 89.8 | 69.4 / 75.3 / 94.4 | 91.8 / 92.6 / 96.5 | 89.9 / 92.1 / 96.0  | 85.7 / 83.0 / 74.2 | 84.8 / 81.4 / 70.4 | 74.1 / 89.7 / 96.8   | 78.1 / 78.9 / 87.4 |
| Regulator         | 78.5 / 73.5 / 90.5 | 70.9 / 67.6 / 85.9 | 85.0 / 85.1 / 97.2 | 85.1 / 85.4 / 97.1  | 80.3 / 74.3 / 81.0 | 87.9 / 84.0 / 84.8 | 82.9 / 86.8 / 98.1   | 58.9 / 58.3 / 73.5 |
| Rolled Strip Base | 96.4 / 96.2 / 98.1 | 94.2 / 90.1 / 98.9 | 98.6 / 97.6 / 98.8 | 99.5 / 98.8 / 99.1  | 96.2 / 91.5 / 86.7 | 87.4 / 89.4 / 94.3 | 93.7 / 93.7 / 99.0   | 98.7 / 97.9 / 98.3 |
| Toy Brick         | 82.9 / 70.4 / 78.7 | 76.6 / 76.1 / 88.6 | 83.4 / 80.1 / 85.0 | 80.8 / 80.5 / 87.1  | 67.6 / 65.7 / 58.7 | 64.1 / 64.9 / 70.8 | 84.1 / 78.5 / 88.5   | 76.7 / 75.4 / 81.8 |
| U Block           | 94.5 / 87.9 / 95.0 | 87.5 / 88.3 / 96.0 | 95.8 / 94.7 / 97.8 | 96.5 / 94.0 / 97.6  | 84.0 / 83.2 / 78.6 | 82.9 / 80.5 / 89.6 | 94.6 / 93.5 / 98.3   | 93.7 / 89.9 / 93.4 |
| Vcpill            | 77.5 / 68.3 / 83.9 | 83.1 / 84.9 / 94.7 | 93.3 / 90.9 / 94.4 | 92.8 / 89.4 / 90.5  | 83.8 / 82.7 / 78.1 | 86.6 / 81.4 / 75.6 | 81.8 / 91.3 / 96.0   | 81.4 / 86.7 / 94.0 |
| Wooden Beads      | 85.7 / 87.2 / 88.4 | 85.7 / 84.3 / 92.1 | 84.0 / 87.4 / 89.3 | 85.0 / 88.5 / 90.0  | 81.5 / 80.7 / 76.8 | 77.1 / 78.0 / 79.8 | 84.5 / 87.4 / 91.6   | 79.1 / 79.0 / 84.1 |
| Woodstick         | 77.4 / 80.8 / 79.3 | 67.7 / 74.9 / 87.0 | 73.2 / 79.2 / 69.7 | 75.4 / 80.1 / 72.7  | 72.8 / 75.2 / 69.6 | 79.7 / 85.7 / 92.7 | 63.1 / 83.8 / 92.5   | 77.6 / 80.7 / 77.3 |
| Tape              | 96.7 / 96.2 / 97.3 | 98.0 / 95.6 / 99.3 | 98.4 / 97.9 / 98.0 | 99.7 / 98.6 / 98.0  | 86.4 / 89.3 / 86.9 | 83.0 / 89.8 / 94.8 | 94.0 / 97.4 / 99.3   | 98.9 / 97.8 / 98.6 |
| Porcelain Doll    | 85.6 / 79.7 / 84.1 | 75.5 / 76.8 / 96.1 | 95.6 / 90.3 / 96.6 | 95.0 / 87.9 / 96.2  | 83.3 / 81.2 / 78.1 | 85.6 / 83.2 / 92.8 | 91.2 / 89.6 / 97.7   | 91.5 / 86.2 / 93.4 |
| Mint              | 69.8 / 68.9 / 65.0 | 79.4 / 68.1 / 72.8 | 88.4 / 78.3 / 82.9 | 87.2 / 75.5 / 84.2  | 81.0 / 71.7 / 52.9 | 52.0 / 54.7 / 43.7 | 68.0 / 72.7 / 86.0   | 72.0 / 64.7 / 57.2 |
| Eraser            | 93.0 / 90.1 / 96.6 | 78.4 / 83.9 / 98.0 | 92.5 / 94.4 / 98.4 | 94.5 / 94.1 / 97.8  | 84.2 / 84.6 / 87.9 | 82.5 / 85.3 / 85.0 | 76.3 / 90.0 / 97.7   | 86.9 / 91.0 / 94.7 |
| Button Battery    | 68.7 / 71.5 / 68.7 | 73.2 / 67.1 / 77.9 | 81.8 / 82.6 / 89.5 | 84.1 / 82.9 / 86.0  | 77.8 / 69.7 / 62.7 | 54.2 / 58.4 / 86.1 | 74.6 / 80.5 / 90.8   | 75.4 / 67.2 / 74.8 |
| Average All       | 82.2 / 80.1 / 86.5 | 81.3 / 79.6 / 90.7 | 91.1 / 89.5 / 93.0 | 92.2 / 90.5 / 92.9  | 82.7 / 79.6 / 75.9 | 81.4 / 80.3 / 83.2 | 80.7 / 87.3 / 94.9   | 85.2 / 82.8 / 87.3 |

FUAD-NR-0.2



Table 6. FUIAD performance (S-AUROC / I-AUROC / P-AUPRO) comparisons with state-of-the-art anomaly detection methods on multi-view Real-IAD with a noisy ratio of 0.4.

| Category          | Embedding-based    |                    |                    |                    | Data-Aug-based     |                    | Reconstruction-based |                    |
|-------------------|--------------------|--------------------|--------------------|--------------------|--------------------|--------------------|----------------------|--------------------|
|                   | PaDim[1]           | CFlow[3]           | PatchCore[6]       | SoftPatch[4]       | SimpleNet[5]       | DeSTSeg[8]         | RD[2]                | UniAD[7]           |
| Audiojack         | 80.5 / 70.7 / 86.8 | 66.2 / 73.3 / 85.5 | 79.7 / 82.8 / 88.3 | 80.4 / 85.2 / 92.7 | 73.1 / 73.3 / 82.9 | 76.9 / 83.4 / 74.8 | 56.4 / 77.3 / 90.4   | 78.1 / 80.4 / 84.5 |
| PCB               | 74.0 / 66.7 / 71.4 | 70.1 / 70.6 / 86.3 | 90.7 / 91.2 / 93.9 | 91.1 / 91.4 / 95.6 | 80.8 / 76.0 / 84.3 | 73.2 / 72.5 / 82.1 | 87.0 / 89.1 / 94.1   | 77.3 / 75.7 / 82.3 |
| Phone Battery     | 69.4 / 80.5 / 89.1 | 73.5 / 78.9 / 94.0 | 80.2 / 88.4 / 95.1 | 87.9 / 91.0 / 88.7 | 67.2 / 73.5 / 55.3 | 62.0 / 78.3 / 83.0 | 70.7 / 86.8 / 97.7   | 72.0 / 82.0 / 91.6 |
| SIM Card Set      | 78.7 / 87.2 / 93.9 | 86.5 / 88.0 / 94.1 | 92.8 / 96.1 / 97.4 | 94.3 / 95.0 / 90.9 | 82.2 / 74.9 / 52.4 | 78.3 / 80.2 / 86.6 | 42.2 / 83.9 / 96.7   | 80.7 / 84.7 / 86.4 |
| Switch            | 68.0 / 70.2 / 87.9 | 62.4 / 68.6 / 86.3 | 89.7 / 87.1 / 91.3 | 97.8 / 94.8 / 95.1 | 80.6 / 76.3 / 75.5 | 89.6 / 85.0 / 84.8 | 73.9 / 71.8 / 90.6   | 88.8 / 82.6 / 90.8 |
| Terminal Block    | 88.0 / 88.2 / 97.7 | 79.7 / 77.5 / 95.3 | 95.3 / 94.1 / 98.4 | 97.2 / 96.8 / 98.6 | 83.8 / 79.2 / 84.1 | 44.7 / 71.9 / 92.9 | 84.8 / 92.6 / 99.1   | 91.5 / 87.2 / 95.2 |
| Toothbrush        | 63.2 / 66.3 / 78.2 | 67.3 / 66.9 / 86.2 | 84.9 / 85.6 / 92.8 | 87.3 / 87.6 / 89.2 | 67.7 / 66.1 / 56.4 | 43.8 / 59.5 / 69.6 | 81.3 / 81.3 / 91.0   | 82.3 / 76.9 / 87.0 |
| Toy               | 63.1 / 58.7 / 80.6 | 55.3 / 52.9 / 75.3 | 90.2 / 83.5 / 91.2 | 91.1 / 86.5 / 92.1 | 75.8 / 65.1 / 58.6 | 77.3 / 68.3 / 75.5 | 64.8 / 76.2 / 92.3   | 60.9 / 58.8 / 74.8 |
| Transistor1       | 66.2 / 76.0 / 91.6 | 91.5 / 87.0 / 94.7 | 98.5 / 94.5 / 97.4 | 95.8 / 92.8 / 96.5 | 83.2 / 76.1 / 79.4 | 70.4 / 68.9 / 47.2 | 95.4 / 92.9 / 97.8   | 96.0 / 87.9 / 92.7 |
| USB               | 50.4 / 59.9 / 80.1 | 75.1 / 73.7 / 83.6 | 88.6 / 89.9 / 95.3 | 93.2 / 93.3 / 97.8 | 73.9 / 78.2 / 81.7 | 84.3 / 83.1 / 84.5 | 77.0 / 89.4 / 96.4   | 77.9 / 76.9 / 87.2 |
| USB Adaptor       | 82.9 / 79.7 / 92.1 | 72.7 / 66.9 / 88.7 | 82.9 / 74.4 / 92.0 | 90.3 / 85.1 / 92.9 | 69.3 / 67.7 / 61.7 | 81.1 / 71.5 / 82.3 | 79.8 / 73.1 / 91.1   | 75.4 / 71.0 / 79.6 |
| Zipper            | 91.9 / 85.6 / 80.0 | 85.5 / 81.7 / 94.7 | 98.9 / 96.6 / 91.2 | 98.1 / 96.3 / 91.1 | 90.2 / 84.6 / 77.6 | 81.5 / 78.4 / 68.8 | 97.0 / 96.7 / 98.0   | 96.0 / 94.9 / 95.5 |
| Bottle Cap        | 94.9 / 90.9 / 97.1 | 89.8 / 85.5 / 97.9 | 97.8 / 95.5 / 98.0 | 98.7 / 97.4 / 98.7 | 87.8 / 79.0 / 81.6 | 83.2 / 79.3 / 75.5 | 84.4 / 92.2 / 98.3   | 97.5 / 92.6 / 96.8 |
| End Cap           | 63.9 / 67.3 / 84.0 | 78.8 / 71.5 / 83.5 | 87.6 / 79.8 / 91.0 | 90.0 / 84.5 / 92.2 | 72.2 / 68.3 / 58.0 | 78.2 / 76.8 / 70.2 | 81.1 / 77.0 / 92.8   | 84.4 / 76.2 / 83.3 |
| Fire Hood         | 74.7 / 74.9 / 78.4 | 84.9 / 82.7 / 94.4 | 81.0 / 83.0 / 89.6 | 83.7 / 84.9 / 91.0 | 77.1 / 73.5 / 70.6 | 82.8 / 79.0 / 80.7 | 48.4 / 78.0 / 93.1   | 78.5 / 77.9 / 85.8 |
| Mounts            | 93.8 / 86.9 / 90.0 | 96.2 / 88.7 / 96.3 | 98.2 / 92.6 / 85.8 | 98.3 / 91.9 / 89.4 | 82.1 / 79.1 / 69.7 | 83.2 / 76.3 / 72.3 | 62.0 / 75.8 / 94.3   | 94.0 / 90.5 / 94.2 |
| Plastic Nut       | 71.7 / 77.1 / 91.5 | 78.2 / 82.2 / 94.2 | 95.8 / 92.6 / 96.0 | 94.6 / 91.6 / 96.9 | 74.9 / 77.8 / 69.9 | 76.7 / 75.2 / 61.4 | 86.3 / 88.6 / 96.6   | 79.5 / 74.5 / 88.2 |
| Plastic Plug      | 77.5 / 82.0 / 90.1 | 87.1 / 86.3 / 94.2 | 89.6 / 92.2 / 96.6 | 89.2 / 91.7 / 95.8 | 85.3 / 79.9 / 70.0 | 85.2 / 82.3 / 83.3 | 83.1 / 89.7 / 96.7   | 72.7 / 75.2 / 87.3 |
| Regulator         | 72.6 / 70.6 / 90.4 | 67.9 / 63.1 / 82.1 | 82.6 / 84.3 / 96.7 | 83.7 / 84.9 / 96.8 | 73.2 / 71.5 / 78.3 | 82.6 / 80.7 / 86.5 | 74.8 / 83.8 / 97.8   | 59.5 / 57.1 / 72.7 |
| Rolled Strip Base | 94.4 / 94.4 / 98.0 | 91.6 / 91.1 / 98.8 | 97.3 / 95.8 / 98.7 | 98.3 / 96.6 / 98.8 | 91.2 / 83.7 / 66.4 | 81.7 / 80.2 / 86.3 | 88.7 / 91.0 / 98.6   | 98.0 / 96.5 / 98.2 |
| Toy Brick         | 78.4 / 68.3 / 78.2 | 76.0 / 75.9 / 87.1 | 80.2 / 78.1 / 84.3 | 80.4 / 78.0 / 86.4 | 66.6 / 63.8 / 65.7 | 63.1 / 60.8 / 62.3 | 81.7 / 78.9 / 88.5   | 73.9 / 73.1 / 80.9 |
| U Block           | 91.7 / 87.2 / 95.2 | 90.0 / 89.3 / 96.5 | 94.8 / 94.5 / 97.8 | 95.8 / 93.4 / 97.5 | 77.0 / 78.5 / 73.9 | 80.3 / 81.5 / 87.0 | 91.9 / 93.0 / 98.2   | 90.5 / 88.1 / 93.0 |
| Vcpill            | 63.7 / 64.8 / 83.3 | 79.9 / 84.1 / 93.8 | 90.3 / 89.4 / 93.9 | 90.2 / 88.6 / 90.0 | 82.6 / 77.8 / 71.2 | 66.8 / 68.6 / 61.2 | 69.1 / 84.5 / 94.2   | 73.4 / 83.5 / 93.2 |
| Wooden Beads      | 81.6 / 84.7 / 88.5 | 84.6 / 86.2 / 92.7 | 81.5 / 85.9 / 88.8 | 82.7 / 87.6 / 89.2 | 75.9 / 77.3 / 72.3 | 57.1 / 51.2 / 66.1 | 73.8 / 82.2 / 91.2   | 73.9 / 75.4 / 84.0 |
| Woodstick         | 73.6 / 79.0 / 78.7 | 67.9 / 73.6 / 87.1 | 70.8 / 78.1 / 68.3 | 74.7 / 79.7 / 71.8 | 69.8 / 71.0 / 67.2 | 76.8 / 79.0 / 73.3 | 46.1 / 79.9 / 92.6   | 76.1 / 79.4 / 77.6 |
| Tape              | 95.5 / 95.4 / 97.3 | 96.3 / 95.9 / 99.3 | 98.0 / 97.7 / 98.0 | 99.2 / 97.9 / 97.9 | 82.6 / 83.4 / 80.6 | 85.8 / 74.8 / 88.9 | 98.3 / 97.8 / 99.3   | 97.0 / 97.0 / 98.4 |
| Porcelain Doll    | 76.5 / 76.4 / 83.7 | 74.7 / 75.6 / 95.3 | 94.3 / 89.0 / 96.4 | 93.5 / 86.7 / 95.9 | 86.7 / 80.5 / 81.4 | 78.8 / 76.9 / 77.6 | 81.6 / 87.8 / 97.8   | 87.1 / 83.0 / 93.1 |
| Mint              | 63.5 / 66.2 / 64.6 | 73.2 / 69.6 / 71.7 | 86.3 / 77.5 / 82.3 | 84.9 / 74.1 / 83.2 | 77.4 / 67.0 / 56.8 | 72.3 / 67.6 / 64.4 | 78.2 / 75.2 / 86.9   | 74.1 / 66.8 / 56.3 |
| Eraser            | 89.3 / 88.8 / 96.9 | 87.4 / 89.4 / 97.7 | 89.9 / 92.8 / 98.3 | 93.6 / 94.0 / 97.7 | 72.7 / 77.2 / 75.9 | 73.9 / 77.7 / 80.3 | 83.4 / 89.7 / 97.8   | 85.4 / 89.6 / 94.3 |
| Button Battery    | 59.9 / 64.3 / 68.9 | 67.5 / 64.0 / 79.8 | 79.7 / 79.9 / 88.3 | 82.7 / 80.7 / 85.0 | 68.3 / 62.3 / 56.2 | 64.4 / 62.2 / 56.2 | 79.7 / 80.0 / 90.4   | 72.8 / 66.5 / 73.9 |
| Average All       | 76.4 / 77.0 / 86.1 | 78.6 / 78.0 / 90.2 | 88.9 / 88.1 / 92.4 | 90.6 / 89.3 / 92.5 | 77.7 / 74.7 / 70.5 | 74.5 / 74.4 / 75.5 | 76.8 / 84.5 / 94.7   | 81.5 / 80.1 / 86.6 |

FUIAD-NR-0.4
